# Supplementary material for: Changes in Supraglacial Lakes on George VI Ice Shelf, Antarctic Peninsula: 1973–2020
Source: Copernicus journal article supplement (doi:10.5194/tc-2021-214), 2021-07-22
Supplement: Supplementary file 1 [file tc-2021-214-supplement.zip]

Archive with 2 entries (2 files):
- Supplement Table S1.pdf
- TC_Supp_BARNESTetal.pdf
