# Supplementary material for: Changes in Supraglacial Lakes on George VI Ice Shelf, Antarctic Peninsula: 1973–2020
Source: Copernicus journal article supplement (doi:10.5194/tc-2021-214), 2021-07-22
Supplement: Supplementary file 1 [file tc-2021-214-supplement.zip › Supplement Table S1.pdf]

| SEASON    | DESIGNATION | DATE       | FULL DESIGNATION                         | SAT |
|-----------|-------------|------------|------------------------------------------|-----|
| 2019-2020 | 215110      | 2019-12-27 | LC08_L1GT_215110_20191227_20200110_01_T2 | LS8 |
| 2019-2020 | 215111      | 2019-12-27 | LC08_L1GT_215111_20191227_20200110_01_T2 | LS8 |
| 2019-2020 | 218110      | 2019-12-26 | LC08_L1GT_218110_20191216_20191226_01_T2 | LS8 |
| 2019-2020 | T19DEA      | 2020-01-19 | L1C_T19DEA_A014993_20200119T131902       | S2  |
| 2019-2020 | T19DEB      | 2020-01-19 | L1C_T19DEB_A014993_20200119T131902       | S2  |
| 2018-2019 | T19DEA      | 2018-12-15 | L1C_T19DEA_A009273_20181215T131902       | S2  |
| 2018-2019 | T19DEB      | 2018-12-15 | L1C_T19DEB_A009273_20181215T131902       | S2  |
| 2018-2019 | T19DEA      | 2019-01-04 | L1C_T19DEA_A009559_20190104T131907       | S2  |
| 2018-2019 | T19DEB      | 2019-01-04 | L1C_T19DEB_A009559_20190104T131907       | S2  |
| 2018-2019 | 215111      | 2019-01-25 | LC08_L1GT_215111_20190125_20190206_01_T2 | LS7 |
| 2018-2019 | T19DEB      | 2019-01-28 | L1C_T19DEB_A009902_20190128T125904       | S2  |
| 2018-2019 | 218110      | 2019-02-15 | LC08_L1GT_218110_20190215_20190222_01_T2 | LS7 |
| 2018-2019 | T19DEB      | 2019-02-17 | L1C_T19DEB_A010188_20190217T130138       | S2  |
| 2018-2019 | 216111      | 2019-02-17 | LC08_L1GT_216111_20190217_20190222_01_T2 | LS7 |
| 2018-2019 | T19DEB      | 2019-02-27 | L1C_T19DEB_A010331_20190227T125953       | S2  |
| 2018-2019 | 217110      | 2019-02-24 | LC08_L1GT_217110_20190224_20190308_01_T2 | LS8 |
| 2018-2019 | T19DEA      | 2019-02-07 | L1C_T19DEA_A010045_20190207T125904       | S2  |
| 2018-2019 | T19DEB      | 2019-02-07 | L1C_T19DEB_A010045_20190207T125904       | S2  |
| 2018-2019 | 216111      | 2019-03-21 | LC08_L1GT_216111_20190321_20190403_01_T2 | LS8 |
| 2018-2019 | 216110      | 2019-03-21 | LC08_L1GT_216110_20190321_20190403_01_T2 | LS8 |
| 2017-2018 | 216111      | 2017-12-28 | LC08_L1GT_216111_20171228_20180103_01_T2 | LS8 |
| 2017-2018 | 218109      | 2017-12-26 | LC08_L1GT_218109_20171226_20180103_01_T2 | LS8 |
| 2017-2018 | 218110      | 2017-12-26 | LC08_L1GT_218110_20171226_20180103_01_T2 | LS8 |
| 2017-2018 | T19DEA      | 2018-01-14 | L1C_T19DEA_A013391_20180114T132158       | S2  |
| 2017-2018 | T19DEB      | 2018-01-14 | L1C_T19DEB_A013391_20180114T132158       | S2  |
| 2017-2018 | T19DEA      | 2018-02-07 | L1C_T19DEA_A013734_20180207T125900       | S2  |
| 2017-2018 | T19DEA      | 2018-02-04 | L1C_T19DEA_A013691_20180204T124902       | S2  |
| 2017-2018 | T19DEB      | 2018-02-07 | L1C_T19DEB_A013734_20180207T125900       | S2  |
| 2017-2018 | T19DEB      | 2018-02-21 | L1C_T19DEB_A005026_20180221T133139       | S2  |
| 2017-2018 | T19DEA      | 2018-03-14 | L1C_T19DEA_A005326_20180314T125856       | S2  |
| 2017-2018 | T19DEB      | 2018-03-30 | L1C_T19DEB_A005555_20180330T131905       | S2  |
| 2016-2017 | 218109      | 2016-12-23 | LC08_L1GT_218109_20161223_20170315_01_T2 | LS8 |
| 2016-2017 | 218110      | 2016-12-23 | LC08_L1GT_218110_20161223_20170315_01_T2 | LS8 |
| 2016-2017 | T19DEA      | 2016-12-20 | L1C_T19DEA_A007814_20161220T131902       | S2  |
| 2016-2017 | T19DEB      | 2016-12-20 | L1C_T19DEB_A007814_20161220T131902       | S2  |
| 2016-2017 | 216110      | 2017-01-10 | LC08_L1GT_216110_20170110_20170311_01_T2 | LS8 |
| 2016-2017 | 216111      | 2017-01-10 | LC08_L1GT_216111_20170110_20170311_01_T2 | LS8 |
| 2016-2017 | T19DEA      | 2017-02-28 | L1C_T19DEA_20170228T131902               | S2  |
| 2016-2017 | T19DEB      | 2017-02-28 | L1C_T19DEB_20170228T131902               | S2  |
| 2016-2017 | T19DEB      | 2017-03-30 | L1C_T19DEB_A009244_20170330T131904       | S2  |
| 2016-2017 | T19DEB      | 2017-03-30 | L1C_T19DEB_A009244_20170330T132212       | S2  |
| 2016-2017 | 219109      | 2017-03-04 | LC08_L1GT_219109_20170304_20170316_01_T2 | LS8 |
| 2016-2017 | 219110      | 2017-03-04 | LC08_L1GT_219110_20170304_20170316_01_T2 | LS8 |
| 2016-2017 | 214111      | 2017-03-01 | LC08_L1GT_214111_20170301_20170316_01_T2 | LS8 |
| 2015-2016 | 218109      | 2015-12-05 | LC08_L1GT_218109_20151205_20170401_01_T2 | LS8 |
| 2015-2016 | 2108110     | 2015-12-05 | LC08_L1GT_218110_20151205_20170401_01_T2 | LS8 |
| 2015-2016 | 219109      | 2016-01-13 | LC08_L1GT_219109_20160113_20170405_01_T2 | LS8 |
| 2015-2016 | 219110      | 2016-01-13 | LC08_L1GT_219110_20160113_20170405_01_T2 | LS8 |

|           |        |            |                                          |     |
|-----------|--------|------------|------------------------------------------|-----|
| 2015-2016 | 216111 | 2016-01-08 | LC08_L1GT_216111_20160108_20170405_01_T2 | LS8 |
| 2015-2016 | 217112 | 2016-02-16 | LC08_L1GT_217112_20160216_20170329_01_T2 | LS8 |
| 2015-2016 | 216111 | 2016-02-09 | LC08_L1GT_216111_20160209_20170330_01_T2 | LS8 |
| 2015-2016 | 216110 | 2016-02-09 | LC08_L1GT_216110_20160209_20170330_01_T2 | LS8 |
| 2015-2016 | 217110 | 2016-02-16 | LC08_L1GT_217110_20160216_20170329_01_T2 | LS8 |
| 2015-2016 | 215111 | 2016-03-21 | LC08_L1GT_215111_20160321_20170327_01_T2 | LS8 |
| 2015-2016 | 217110 | 2016-03-19 | LC08_L1GT_217110_20160319_20170328_01_T2 | LS8 |
| 2014-2015 | 217110 | 2014-12-27 | LC08_L1GT_217110_20141227_20170415_01_T2 | LS8 |
| 2014-2015 | 218110 | 2015-01-03 | LC08_L1GT_218110_20150103_20170415_01_T2 | LS8 |
| 2014-2015 | 218109 | 2015-01-03 | LC08_L1GT_218109_20150103_20170415_01_T2 | LS8 |
| 2014-2015 | 217110 | 2015-01-28 | LC08_L1GT_217110_20150128_20170413_01_T2 | LS8 |
| 2014-2015 | 219109 | 2015-02-27 | LC08_L1GT_219109_20150227_20170412_01_T2 | LS8 |
| 2014-2015 | 218110 | 2015-02-04 | LC08_L1GT_218110_20150204_20170413_01_T2 | LS8 |
| 2014-2015 | 218110 | 2015-03-08 | LC08_L1GT_218110_20150308_20170412_01_T2 | LS8 |
| 2014-2015 | 217110 | 2015-03-17 | LC08_L1GT_217110_20150317_20170412_01_T2 | LS8 |
| 2013-2014 | 218110 | 2013-12-31 | LC08_L1GT_218110_20131231_20170427_01_T2 | LS8 |
| 2013-2014 | 215111 | 2013-12-26 | LC08_L1GT_215111_20131226_20170427_01_T2 | LS8 |
| 2013-2014 | 218109 | 2013-12-31 | LC08_L1GT_218109_20131231_20170427_01_T2 | LS8 |
| 2013-2014 | 214111 | 2014-01-04 | LC08_L1GT_214111_20140104_20170427_01_T2 | LS8 |
| 2013-2014 | 219110 | 2014-01-07 | LC08_L1GT_219110_20140107_20170427_01_T2 | LS8 |
| 2013-2014 | 215111 | 2014-02-10 | LC08_L1GT_215111_20140212_20170425_01_T2 | LS8 |
| 2013-2014 | 217110 | 2014-02-10 | LC08_L1GT_217110_20140210_20170425_01_T2 | LS8 |
| 2013-2014 | 219109 | 2014-02-08 | LC08_L1GT_219109_20140208_20170426_01_T2 | LS8 |
| 2013-2014 | 215111 | 2014-03-16 | LC08_L1GT_215111_20140316_20170425_01_T2 | LS8 |
| 2013-2014 | 219109 | 2014-03-12 | LC08_L1GT_219109_20140312_20180528_01_T2 | LS8 |
| 2013-2014 | 219110 | 2014-03-28 | LC08_L1GT_219110_20140328_20170424_01_T2 | LS8 |
| 2013-2014 | 218110 | 2014-03-05 | LC08_L1GT_218110_20140305_20170425_01_T2 | LS8 |
| 2012-2013 | 215111 | 2012-12-15 | LE07_L1GT_215111_20121215_20161128_01_T2 | LS7 |
| 2012-2013 | 216110 | 2012-12-22 | LE07_L1GT_216110_20121222_20190516_01_T2 | LS7 |
| 2012-2013 | 218109 | 2012-12-04 | LE07_L1GT_218109_20121204_20161127_01_T2 | LS7 |
| 2012-2013 | 218110 | 2012-12-04 | LE07_L1GT_218110_20121204_20161127_01_T2 | LS7 |
| 2012-2013 | 216110 | 2013-01-07 | LE07_L1GT_216110_20130107_20161126_01_T2 | LS7 |
| 2012-2013 | 216111 | 2013-01-07 | LE07_L1GT_216111_20130107_20161126_01_T2 | LS7 |
| 2012-2013 | 218110 | 2013-02-22 | LE07_L1GT_218110_20130222_20161125_01_T2 | LS7 |
| 2012-2013 | 218110 | 2013-03-10 | LE07_L1GT_218110_20130310_20161125_01_T2 | LS7 |
| 2012-2013 | 216110 | 2013-03-12 | LE07_L1GT_216110_20130312_20161126_01_T2 | LS7 |
| 2011-2012 | 216111 | 2011-12-20 | LE07_L1GT_216111_20111220_20161204_01_T2 | LS7 |
| 2011-2012 | 216110 | 2011-12-20 | LE07_L1GT_216110_20111220_20161204_01_T2 | LS7 |
| 2011-2012 | 218109 | 2012-01-03 | LE07_L1GT_218109_20120103_20161203_01_T2 | LS7 |
| 2011-2012 | 218110 | 2012-01-03 | LE07_L1GT_218110_20120103_20161203_01_T2 | LS7 |
| 2011-2012 | 215111 | 2012-02-15 | LE07_L1GT_215111_20120215_20161203_01_T2 | LS7 |
| 2011-2012 | 217110 | 2012-02-13 | LE07_L1GT_217110_20120213_20161203_01_T2 | LS7 |
| 2011-2012 | 220109 | 2012-02-18 | LE07_L1GT_220109_20120218_20161203_01_T2 | LS7 |
| 2011-2012 | 216111 | 2012-03-09 | LE07_L1GT_216111_20120309_20161203_01_T2 | LS7 |
| 2010-2011 | 217110 | 2010-12-24 | LE07_L1GT_217110_20101224_20161211_01_T2 | LS7 |
| 2010-2011 | 217111 | 2010-12-24 | LE07_L1GT_217111_20101224_20161211_01_T2 | LS7 |
| 2010-2011 | 220109 | 2010-12-29 | LE07_L1GT_220109_20101229_20161211_01_T2 | LS7 |
| 2010-2011 | 217109 | 2011-01-25 | LE07_L1GT_217109_20110125_20161210_01_T2 | LS7 |
| 2010-2011 | 217110 | 2011-01-25 | LE07_L1GT_217110_20110125_20161210_01_T2 | LS7 |

|           |        |            |                                          |     |
|-----------|--------|------------|------------------------------------------|-----|
| 2010-2011 | 217111 | 2011-01-25 | LE07_L1GT_217111_20110125_20161211_01_T2 | LS7 |
| 2009-2010 | 215111 | 2009-12-23 | LE07_L1GT_215111_20091223_20161216_01_T2 | LS7 |
| 2009-2010 | 217110 | 2010-01-06 | LE07_L1GT_217110_20100106_20161216_01_T2 | LS7 |
| 2009-2010 | 216111 | 2010-01-15 | LE07_L1GT_216111_20100115_20161217_01_T2 | LS7 |
| 2009-2010 | 218110 | 2010-01-29 | LE07_L1GT_218110_20100129_20161217_01_T2 | LS7 |
| 2009-2010 | 214111 | 2010-02-02 | LE07_L1GT_214111_20100202_20161215_01_T2 | LS7 |
| 2009-2010 | 215111 | 2010-02-09 | LE07_L1GT_215111_20100209_20161216_01_T2 | LS7 |
| 2009-2010 | 218109 | 2010-02-14 | LE07_L1GT_218109_20100214_20161216_01_T2 | LS7 |
| 2009-2010 | 220109 | 2010-02-12 | LE07_L1GT_220109_20100212_20161215_01_T2 | LS7 |
| 2009-2010 | 217110 | 2010-03-11 | LE07_L1GT_217110_20100311_20161215_01_T2 | LS7 |
| 2009-2010 | 217111 | 2010-03-11 | LE07_L1GT_217111_20100311_20161216_01_T2 | LS7 |
| 2008-2009 | 217110 | 2008-12-18 | LE07_L1GT_217110_20081218_20161223_01_T2 | LS7 |
| 2008-2009 | 217111 | 2008-12-18 | LE07_L1GT_217111_20081218_20161223_01_T2 | LS7 |
| 2008-2009 | 220109 | 2008-12-07 | LE07_L1GT_220109_20081207_20161223_01_T2 | LS7 |
| 2008-2009 | 217110 | 2009-01-19 | LE07_L1GT_217110_20090119_20161222_01_T2 | LS7 |
| 2008-2009 | 218110 | 2009-01-10 | LE07_L1GT_218110_20090110_20161223_01_T2 | LS7 |
| 2008-2009 | 215111 | 2009-01-05 | LE07_L1GT_215111_20090105_20161223_01_T2 | LS7 |
| 2008-2009 | 216110 | 2009-02-13 | LE07_L1GT_216110_20090213_20161222_01_T2 | LS7 |
| 2008-2009 | 216111 | 2009-02-13 | LE07_L1GT_216111_20090213_20161222_01_T2 | LS7 |
| 2008-2009 | 218110 | 2009-02-11 | LE07_L1GT_218110_20090211_20161222_01_T2 | LS7 |
| 2008-2009 | 219109 | 2009-03-06 | LE07_L1GT_219109_20090306_20161221_01_T2 | LS7 |
| 2008-2009 | 219110 | 2009-03-06 | LE07_L1GT_219110_20090306_20161221_01_T2 | LS7 |
| 2007-2008 | 215110 | 2007-12-18 | LE07_L1GT_215110_20071218_20161231_01_T2 | LS7 |
| 2007-2008 | 215111 | 2007-12-18 | LE07_L1GT_215111_20071218_20170101_01_T2 | LS7 |
| 2007-2008 | 216110 | 2007-12-09 | LE07_L1GT_216110_20071209_20170101_01_T2 | LS7 |
| 2007-2008 | 218110 | 2007-12-23 | LE07_L1GT_218110_20071223_20161231_01_T2 | LS7 |
| 2007-2008 | 216111 | 2008-01-10 | LE07_L1GT_216111_20080110_20161231_01_T2 | LS7 |
| 2007-2008 | 218109 | 2008-01-08 | LE07_L1GT_218109_20080108_20161231_01_T2 | LS7 |
| 2007-2008 | 218110 | 2008-01-08 | LE07_L1GT_218110_20080108_20161231_01_T2 | LS7 |
| 2007-2008 | 214111 | 2008-02-29 | LE07_L1GT_214111_20080229_20161230_01_T2 | LS7 |
| 2006-2007 | 217110 | 2006-12-13 | LE07_L1GT_217110_20061213_20170106_01_T2 | LS7 |
| 2006-2007 | 217110 | 2006-12-29 | LE07_L1GT_217110_20061229_20170105_01_T2 | LS7 |
| 2006-2007 | 217111 | 2006-12-29 | LE07_L1GT_217111_20061229_20170105_01_T2 | LS7 |
| 2006-2007 | 216110 | 2007-01-07 | LE07_L1GT_216110_20070107_20170105_01_T2 | LS7 |
| 2006-2007 | 216111 | 2007-01-07 | LE07_L1GT_216111_20070107_20170105_01_T2 | LS7 |
| 2006-2007 | 217110 | 2007-01-30 | LE07_L1GT_217110_20070130_20170105_01_T2 | LS7 |
| 2006-2007 | 216110 | 2007-02-08 | LE07_L1GT_216110_20070208_20170104_01_T2 | LS7 |
| 2006-2007 | 216111 | 2007-02-08 | LE07_L1GT_216111_20070208_20170104_01_T2 | LS7 |
| 2006-2007 | 220109 | 2007-02-04 | LE07_L1GT_220109_20070204_20170105_01_T2 | LS7 |
| 2005-2006 | 216110 | 2005-12-03 | LE07_L1GT_216110_20051203_20170111_01_T2 | LS7 |
| 2005-2006 | 216111 | 2005-12-03 | LE07_L1GT_216111_20051203_20170112_01_T2 | LS7 |
| 2005-2006 | 218109 | 2005-12-17 | LE07_L1GT_218109_20051217_20170111_01_T2 | LS7 |
| 2005-2006 | 218110 | 2005-12-17 | LE07_L1GT_218110_20051217_20170112_01_T2 | LS7 |
| 2005-2006 | 217110 | 2006-01-27 | LE07_L1GT_217110_20060127_20170110_01_T2 | LS7 |
| 2005-2006 | 218109 | 2006-01-18 | LE07_L1GT_218109_20060118_20170111_01_T2 | LS7 |
| 2005-2006 | 218110 | 2006-01-18 | LE07_L1GT_218110_20060118_20170111_01_T2 | LS7 |
| 2005-2006 | 217110 | 2006-02-28 | LE07_L1GT_217110_20060228_20170110_01_T2 | LS7 |
| 2005-2006 | 218109 | 2006-02-03 | LE07_L1GT_218109_20060203_20170110_01_T2 | LS7 |
| 2005-2006 | 218110 | 2006-02-19 | LE07_L1GT_218110_20060219_20170110_01_T2 | LS7 |

|           |        |            |                                          |     |
|-----------|--------|------------|------------------------------------------|-----|
| 2004-2005 | 218110 | 2005-01-15 | LE07_L1GT_218110_20050115_20170116_01_T2 | LS7 |
| 2004-2005 | 218111 | 2005-01-15 | LE07_L1GT_218111_20050115_20170116_01_T2 | LS7 |
| 2004-2005 | 218109 | 2005-01-15 | LE07_L1GT_218109_20050115_20170117_01_T2 | LS7 |
| 2004-2005 | 219110 | 2005-02-23 | LE07_L1GT_219110_20050223_20170116_01_T2 | LS7 |
| 2004-2005 | 216110 | 2005-03-22 | LE07_L1GT_216110_20050322_20170116_01_T2 | LS7 |
| 2004-2005 | 219109 | 2005-03-11 | LE07_L1GT_219109_20050311_20170115_01_T2 | LS7 |
| 2004-2005 | 219110 | 2005-03-11 | LE07_L1GT_219110_20050311_20170115_01_T2 | LS7 |
| 2003-2004 | 218110 | 2004-01-29 | LE07_L1GT_218110_20040129_20170123_01_T2 | LS7 |
| 2003-2004 | 220109 | 2004-01-27 | LE07_L1GT_220109_20040127_20170122_01_T2 | LS7 |
| 2003-2004 | 216110 | 2004-02-16 | LE07_L1GT_216110_20040216_20170122_01_T2 | LS7 |
| 2003-2004 | 216111 | 2004-02-16 | LE07_L1GT_216111_20040216_20170122_01_T2 | LS7 |
| 2003-2004 | 219110 | 2004-02-05 | LE07_L1GT_219110_20040205_20170122_01_T2 | LS7 |
| 2003-2004 | 218110 | 2004-03-17 | LE07_L1GT_218110_20040317_20170122_01_T2 | LS7 |
| 2003-2004 | 218111 | 2004-03-17 | LE07_L1GT_218111_20040317_20170122_01_T2 | LS7 |
| 2003-2004 | 216110 | 2004-03-03 | LE07_L1GT_216110_20040303_20170122_01_T2 | LS7 |
| 2002-2003 | 216111 | 2002-12-11 | LE07_L1GT_216111_20021211_20170127_01_T2 | LS7 |
| 2002-2003 | 216110 | 2002-12-11 | LE07_L1GT_216110_20021211_20170128_01_T2 | LS7 |
| 2002-2003 | 218109 | 2002-12-25 | LE07_L1GT_218109_20021225_20170127_01_T2 | LS7 |
| 2002-2003 | 218110 | 2002-12-25 | LE07_L1GT_218110_20021225_20170127_01_T2 | LS7 |
| 2002-2003 | 218110 | 2003-01-26 | LE07_L1GT_218110_20030126_20170126_01_T2 | LS7 |
| 2002-2003 | 218111 | 2003-01-26 | LE07_L1GT_218111_20030126_20170126_01_T2 | LS7 |
| 2002-2003 | 219109 | 2003-01-17 | LE07_L1GT_219109_20030117_20170127_01_T2 | LS7 |
| 2002-2003 | 219110 | 2003-01-17 | LE07_L1GT_219110_20030117_20170127_01_T2 | LS7 |
| 2002-2003 | 215111 | 2003-01-05 | LE07_L1GT_215111_20030105_20170128_01_T2 | LS7 |
| 2002-2003 | 215111 | 2003-02-22 | LE07_L1GT_215111_20030222_20170126_01_T2 | LS7 |
| 2002-2003 | 216110 | 2003-02-13 | LE07_L1GT_216110_20030213_20170126_01_T2 | LS7 |
| 2002-2003 | 216111 | 2003-02-13 | LE07_L1GT_216111_20030213_20170126_01_T2 | LS7 |
| 2002-2003 | 218110 | 2003-02-11 | LE07_L1GT_218110_20030211_20170126_01_T2 | LS7 |
| 2002-2003 | 216110 | 2003-03-01 | LE07_L1GT_216110_20030301_20170127_01_T2 | LS7 |
| 2001-2002 | 216110 | 2001-12-24 | LE07_L1GT_216110_20011224_20170201_01_T2 | LS7 |
| 2001-2002 | 216111 | 2001-12-24 | LE07_L1GT_216111_20011224_20170201_01_T2 | LS7 |
| 2001-2002 | 219109 | 2001-12-29 | LE07_L1GT_219109_20011229_20170201_01_T2 | LS7 |
| 2001-2002 | 219110 | 2001-12-29 | LE07_L1GT_219110_20011229_20170201_01_T2 | LS7 |
| 2001-2002 | 215110 | 2002-01-18 | LE07_L1GT_215110_20020118_20170201_01_T2 | LS7 |
| 2001-2002 | 216111 | 2002-01-09 | LE07_L1GT_216111_20020109_20170201_01_T2 | LS7 |
| 2001-2002 | 218109 | 2002-01-07 | LE07_L1GT_218109_20020107_20170201_01_T2 | LS7 |
| 2001-2002 | 218110 | 2002-01-07 | LE07_L1GT_218110_20020107_20170201_01_T2 | LS7 |
| 2000-2001 | 218109 | 2001-01-04 | LE07_L1GT_218109_20010104_20170208_01_T2 | LS7 |
| 2000-2001 | 218110 | 2001-01-04 | LE07_L1GT_218110_20010104_20170208_01_T2 | LS7 |
| 2000-2001 | 219109 | 2001-01-27 | LE07_L1GT_219109_20010127_20170207_01_T2 | LS7 |
| 2000-2001 | 215111 | 2001-01-31 | LE07_L1GT_215111_20010131_20170207_01_T2 | LS7 |
| 2000-2001 | 217110 | 2001-02-14 | LE07_L1GT_217110_20010214_20170206_01_T2 | LS7 |
| 2000-2001 | 217111 | 2001-02-14 | LE07_L1GT_217111_20010214_20170206_01_T2 | LS7 |
| 2000-2001 | 220109 | 2001-02-19 | LE07_L1GT_220109_20010219_20170206_01_T2 | LS7 |
| 1999-2000 | 214111 | 2000-01-22 | LE07_L1GT_214111_20000122_20170213_01_T2 | LS7 |
| 1999-2000 | 217110 | 2000-01-27 | LE07_L1GT_217110_20000127_20170213_01_T2 | LS7 |
| 1999-2000 | 218110 | 2000-01-02 | LE07_L1GT_218110_20000102_20170215_01_T2 | LS7 |
| 1999-2000 | 217110 | 2000-02-28 | LE07_L1GT_217110_20000228_20170213_01_T2 | LS7 |
| 1996-1997 | 214111 | 1997-01-21 | LT05_L1GS_214111_19970121_20170102_01_T2 | LS5 |

|           |        |            |                                          |     |
|-----------|--------|------------|------------------------------------------|-----|
| 1996-1997 | 215111 | 1997-01-28 | LT05_L1GS_215111_19970128_20170102_01_T2 | LS5 |
| 1990-1991 | 216111 | 1991-02-04 | LT05_L1GS_216111_19910204_20170128_01_T2 | LS5 |
| 1990-1991 | 216110 | 1991-02-04 | LT05_L1GS_216110_19910204_20170128_01_T2 | LS5 |
| 1989-1990 | 217111 | 1990-01-15 | LT04_L1GS_217111_19900115_20170131_01_T2 | LS4 |
| 1989-1990 | 217110 | 1990-01-15 | LT04_L1GS_217110_19900115_20170131_01_T2 | LS4 |
| 1988-1989 | 217111 | 1989-01-28 | LT04_L1GS_217111_19890128_20170204_01_T2 | LS4 |
| 1988-1989 | 217110 | 1989-01-28 | LT04_L1GS_217110_19890128_20170204_01_T2 | LS4 |
| 1988-1989 | 215111 | 1989-01-30 | LT04_L1GS_215111_19890130_20170204_01_T2 | LS4 |
| 1988-1989 | 215110 | 1989-01-30 | LT04_L1GS_215110_19890130_20170204_01_T2 | LS4 |
| 1972-1973 | 232110 | 1973-01-09 | LM01_L1GS_232110_19730109_20180427_01_T2 | LS1 |
| 1972-1973 | 231111 | 1973-01-09 | LM01_L1GS_231111_19730109_20180427_01_T2 | LS1 |
| 1972-1973 | 231110 | 1973-01-09 | LM01_L1GS_231110_19730109_20180427_01_T2 | LS1 |
